# Supplementary material for: Dietary Intake in Population with Metabolic Syndrome: Is the Prevalence of Inadequate Intake Influenced by Geographical Area? Cross-Sectional Analysis from PREDIMED-Plus Study
Source: PubMed Central journal article supplement (PMC6266979; doi:10.3390/nu10111661), 2018-11-04
Supplement: nutrients-10-01661-s001.pdf [file nutrients-10-01661-s001.pdf]

Article

# Dietary Intake in Population with Metabolic Syndrome: Is the Prevalence of Inadequate Intake Influenced by Geographical Area? Cross-Sectional Analysis from PREDIMED-Plus Study

Naomi Cano-Ibáñez <sup>1,2,\*</sup>, Aurora Bueno-Cavanillas <sup>1,2</sup>, Miguel A. Martínez-González <sup>3,4,5</sup>, Dolores Corella <sup>5,6</sup>, Jordi Salas-Salvadó <sup>5,7</sup>, M. Dolors Zomeño <sup>8,9</sup>, Manoli García-de-la-Hera <sup>2,10</sup>, Dora Romaguera <sup>5,11</sup>, J. Alfredo Martínez <sup>5,12,13</sup>, F. Javier Barón-López <sup>5,14</sup>, Antonio García-Ríos <sup>5,15</sup>, Ramón Estruch <sup>5,16</sup>, Laura García-Molina <sup>1,2</sup>, Ángel Alonso Gómez <sup>5,17</sup>, Josep A. Tur <sup>5,18</sup>, Francisco Tinahones <sup>5,19</sup>, Lluís Serra-Majem <sup>5,20</sup>, Nairara Cubelos-Fernández <sup>21</sup>, José Lapetra <sup>5,22</sup>, Clotilde Vázquez <sup>5,23</sup>, Xavier Pintó <sup>5,24</sup>, Josep Vidal <sup>25,26</sup>, Lidia Daimiel <sup>13</sup>, José Juan Gaforio <sup>2,27</sup>, Pilar Matía <sup>28</sup>, Emilio Ros <sup>5,29</sup>, Javier Díez-Espino <sup>3,5,30</sup>, Rebeca Fernández-Carrión <sup>5,6</sup>, Josep Basora <sup>5,7</sup>, Montse Fitó <sup>5,8</sup>, Juan Manuel Zazo <sup>2,10</sup>, Antoni Colom <sup>5,11</sup>, Estefanía Toledo <sup>3,5</sup>, Andrés Díaz-López <sup>5,7</sup>, Miguel Ángel Muñoz <sup>31</sup>, Miguel Ruiz-Canela <sup>3,4,5</sup> and Alfredo Gea <sup>3,5</sup>

## Supplementary Materials:

**Table S1.** Intake of food groups (g/day) in both sexes divided by geographical areas and age.

|                     | 55-70 years           |                         |                       |                       |                |                       |                         |                       |                       |                |
|---------------------|-----------------------|-------------------------|-----------------------|-----------------------|----------------|-----------------------|-------------------------|-----------------------|-----------------------|----------------|
|                     | Men                   |                         |                       |                       |                | Women                 |                         |                       |                       |                |
|                     | North area<br>(n=724) | Central area<br>(n=245) | East area<br>(n=1269) | South area<br>(n=774) | <i>P value</i> | North area<br>(n=479) | Central area<br>(n=199) | East area<br>(n=1209) | South area<br>(n=774) | <i>P value</i> |
| Vegetables          | 277.1 ±95.3           | 304.4 ±155.8            | 317.5 ±141.9          | 314.1 ±141.4          | <0.001         | 301.2 ±106.8          | 357.2 ±163.9            | 358.6 ±144.7          | 352.3 ±146.0          | <0.001         |
| Fruits              | 354.8 ±204.8          | 346.5 ±259.1            | 315.5 ±184.3          | 339.5 ±195.9          | 0.001          | 412.2 ±225.2          | 369.1 ±242.6            | 343.2 ±187.4          | 387.5 ±215.6          | <0.001         |
| Legumes             | 18.9 ±8.2             | 20.6 ±10.9              | 20.2 ±11.5            | 23.0 ±10.6            | <0.001         | 17.7 ±7.8             | 20.8 ±13.9              | 19.2 ±10.9            | 23.7 ±11.5            | <0.001         |
| Cereals             | 190.5 ±100.0          | 156.9 ±92.3             | 153.4 ±76.5           | 152.1 ±75.9           | <0.001         | 152.8 ±77.3           | 142.6 ±87.4             | 132.5 ±66.7           | 135.0 ±63.7           | <0.001         |
| Milk/dairy products | 333.9 ±206.3          | 379.3 ±220.1            | 306.4 ±188.7          | 337.1 ±200.1          | <0.001         | 401.0 ±208.4          | 377.9 ±177.9            | 334.6 ±193.1          | 375.7 ±214.8          | <0.001         |
| Meat/meat products  | 155.7 ±54.8           | 153.4 ±58.7             | 163.0 ±63.0           | 137.7 ±57.4           | <0.001         | 147.7 ±51.0           | 134.8 ±51.3             | 150.1 ±56.1           | 117.7 ±48.5           | <0.001         |
| Olive oil           | 43.2 ±13.5            | 35.4 ±20.5              | 41.1 ±16.7            | 39.6 ±19.0            | <0.001         | 43.3 ±14.7            | 36.8 ±18.6              | 39.9 ±16.7            | 33.4 ±17.5            | <0.001         |
| Fish/seafood        | 92.9 ±40.6            | 107.8 ±53.6             | 99.0 ±48.1            | 102.3 ±48.9           | <0.001         | 99.8 ±38.1            | 114.2 ±67.5             | 106.3 ±45.8           | 99.0 ±46.1            | <0.001         |
| Nuts                | 13.2 ±16.1            | 16.3 ±20.9              | 15.5 ±17.3            | 15.3 ±16.5            | 0.018          | 12.0 ±16.5            | 15.5 ±23.1              | 15.0 ±17.3            | 16.0 ±18.2            | 0.001          |
| Sugar/sweets        | 34.3 ±37.6            | 31.8 ±30.6              | 27.8 ±30.2            | 23.3 ±24.1            | <0.001         | 31.0 ±34.1            | 27.7 ±31.0              | 23.5 ±24.9            | 22.8 ±24.9            | <0.001         |
| Eggs                | 27.7 ±14.8            | 24.9 ±14.1              | 23.7 ±12.4            | 23.7 ±12.8            | <0.001         | 24.1 ±11.4            | 23.2 ±14.7              | 21.8 ±9.2             | 22.4 ±10.8            | 0.006          |

|                     | More than 70 years |             |             |             |        |             |             |             |             |        |
|---------------------|--------------------|-------------|-------------|-------------|--------|-------------|-------------|-------------|-------------|--------|
|                     | Men                |             |             |             |        | Women       |             |             |             |        |
| Vegetables          | 298.6±113.7        | 308.6±120.0 | 325.0±143.7 | 326.9±128.3 | 0.368  | 304.9±105.7 | 333.3±137.6 | 332.1±141.7 | 330.0±136.2 | 0.245  |
| Fruits              | 403.6±191.9        | 330.4±219.9 | 353.0±195.8 | 342.8±164.6 | 0.087  | 466.5±194.9 | 481.3±383.6 | 359.4±198.9 | 429.2±235.1 | <0.001 |
| Legumes             | 21.1±8.6           | 25.8±18.1   | 21.0±12.9   | 22.7±10.5   | 0.280  | 20.8±15.3   | 17.1±11.9   | 18.3±9.4    | 22.1±11.5   | 0.008  |
| Cereals             | 187.0±95.9         | 152.7±82.7  | 154.6±76.4  | 147.6±82.7  | 0.004  | 158.8±88.0  | 153.0±98.1  | 124.8±58.5  | 135.7±69.1  | 0.001  |
| Milk/dairy products | 321.7±185.4        | 409.3±234.8 | 295.5±172.4 | 334.2±172.3 | 0.035  | 432.7±197.5 | 465.5±221.1 | 356.3±196.8 | 403.6±220.2 | 0.001  |
| Meat/meat products  | 149.2±55.3         | 151.4±46.6  | 153.5±55.2  | 109.7±41.6  | <0.001 | 143.3±50.6  | 127.2±45.5  | 141.5±53.0  | 111.9±47.2  | <0.001 |
| Olive oil           | 42.6±13.8          | 36.5±21.0   | 40.7±16.6   | 35.1±17.5   | 0.064  | 41.0±14.1   | 35.7±17.5   | 41.2±15.6   | 33.4±17.5   | <0.001 |
| Fish/seafood        | 94.6±41.5          | 105.2±52.8  | 102.3±45.0  | 94.2±47.3   | 0.327  | 94.2±38.5   | 101.6±62.6  | 102.9±48.4  | 92.4±40.3   | 0.104  |
| Nuts                | 14.6±17.9          | 17.6±19.2   | 15.5±16.2   | 14.8±15.3   | 0.891  | 13.2±14.5   | 21.6±27.7   | 12.0±13.5   | 14.2±14.8   | 0.001  |
| Sugar/sweets        | 35.2±39.1          | 29.9±57.5   | 26.7±31.5   | 28.6±43.7   | 0.324  | 29.9±32.0   | 23.6±20.5   | 22.0±24.5   | 20.3±22.5   | 0.012  |
| Eggs                | 25.8±16.7          | 25.3±14.6   | 21.6±9.6    | 23.4±10.4   | 0.036  | 23.9±9.9    | 24.4±10.3   | 21.3±9.6    | 22.3±9.2    | 0.056  |

Data are expressed as means ± SD. ANOVA test was performed.

**Table S2.** MedDiet adherence, total energy intake and profile of macronutrients, fiber and alcohol intake by geographical areas (total population *n* = 6646) among 55-75 years population.

|                                                  | 55-70 years           |                         |                       |                       |                          |                       |                         |                       |                       |                          |
|--------------------------------------------------|-----------------------|-------------------------|-----------------------|-----------------------|--------------------------|-----------------------|-------------------------|-----------------------|-----------------------|--------------------------|
|                                                  | Men                   |                         |                       |                       |                          | Women                 |                         |                       |                       |                          |
|                                                  | North area<br>(n=724) | Central area<br>(n=245) | East area<br>(n=1269) | South area<br>(n=774) | <i>P</i><br><i>value</i> | North area<br>(n=479) | Central area<br>(n=199) | East area<br>(n=1209) | South area<br>(n=774) | <i>P</i><br><i>value</i> |
| MedDiet adherence<br>Mean ±SD                    | 8.1±2.7               | 9.0±2.4                 | 7.7±2.6               | 8.5±2.6               | <0.001                   | 9.0±2.7               | 9.4±2.4                 | 8.5±2.6               | 9.2±2.5               | <0.001                   |
| Low adherence, n (%)                             | 307 (42.4)            | 77 (31.4)               | 621 (48.9)            | 269 (34.8)            |                          | 146 (30.5)            | 43 (21.6)               | 435 (35.6)            | 186 (24.0)            |                          |
| Medium adherence, n (%)                          | 272 (37.6)            | 106 (43.3)              | 466 (36.7)            | 330 (42.7)            | <0.001                   | 188 (39.3)            | 89 (44.7)               | 502 (41.5)            | 356 (46.09)           | <0.001                   |
| High adherence, n (%)                            | 145 (20.0)            | 62 (25.3)               | 182 (14.3)            | 175 (22.6)            |                          | 145 (30.3)            | 67 (33.7)               | 272 (22.5)            | 232 (30.0)            |                          |
| Total energy intake, mean ±sd                    | 2575±533              | 2507±629                | 2524±5446             | 2456±572              | 0.001                    | 2262±501              | 2293±519                | 2205±485              | 2173±501              | 0.002                    |
| %Total fat intake,mean ±sd                       | 37.6±5.9              | 38.0±6.5                | 40.0±6.0              | 39.5±6.9              | <0.001                   | 39.4±6.3              | 39.1±7.1                | 40.8±6.4              | 38.9±7.1              | <0.001                   |
| % Monounsaturated fat,mean ±sd                   | 19.4±4.0              | 19.0±4.5                | 20.8±4.3              | 20.6±5.1              | <0.001                   | 20.8±4.3              | 20.1±5.3                | 21.3±4.7              | 20.3±5.1              | <0.001                   |
| % Polyunsaturated fat,mean ±sd                   | 6.0±1.9               | 6.3±2.0                 | 6.3±1.7               | 6.5±1.6               | <0.001                   | 6.1±2.0               | 6.3±1.9                 | 6.5±1.9               | 6.5±1.8               | 0.002                    |
| % Saturated fat, mean ±sd                        | 9.4±1.8               | 10.1±2.1                | 10.3±2.0              | 9.7±1.8               | <0.001                   | 9.7±2.0               | 10.1±2.2                | 10.3±2.0              | 9.5±1.9               | <0.001                   |
| % Carbohydrate intake,mean ±sd                   | 41.2±6.6              | 41.0±6.3                | 39.5±6.5              | 40.4±7.1              | <0.001                   | 41.9±6.4              | 42.2±7.2                | 40.1±6.6              | 42.9±7.2              | <0.001                   |
| Protein intake (%),mean ±sd                      | 15.5±2.4              | 16.6±3.2                | 16.0±2.7              | 15.8±2.7              | <0.001                   | 17.2±2.5              | 17.3±3.0                | 17.7±2.8              | 17.0±2.6              | <0.001                   |
| Alcohol intake (g/d),mean ±sd                    | 21.3±20.9             | 16.3±17.6               | 16.2±16.4             | 15.5±15.7             | <0.001                   | 5.1±10.2              | 4.7±7.6                 | 4.5±6.9               | 4.1±6.9               | 0.162                    |
| Fiber intake (g/d),mean ±sd                      | 25.1±8.6              | 25.3±9.2                | 25.2±8.5              | 24.9±8.6              | 0.883                    | 25.9±8.3              | 27.2±9.7                | 26.3±8.5              | 27.6±9.4              | 0.003                    |
|                                                  | More than 70 years    |                         |                       |                       |                          |                       |                         |                       |                       |                          |
|                                                  | Men                   |                         |                       |                       |                          | Women                 |                         |                       |                       |                          |
| MedDiet Q-P17 <sup>a</sup> adherence<br>Mean ±SD | 8.5±3.1               | 8.5±2.4                 | 8.3±2.6               | 9.0±2.5               | 0.275                    | 9.3±2.6               | 9.5±2.0                 | 8.5±2.1               | 9.4±2.5               | 0.002                    |
| Low adherence, n (%)                             | 38 (38.4)             | 5 (26.3)                | 80 (30.3)             | 30 (32.6)             |                          | 32 (23.9)             | 5 (16.7)                | 89 (35.5)             | 33 (23.7)             |                          |
| Medium adherence, n (%)                          | 33 (33.3)             | 10 (52.6)               | 89 (42.6)             | 41 (44.6)             | 0.622                    | 59 (44.0)             | 16 (53.3)               | 103 (41.0)            | 54 (38.9)             | 0.004                    |

|                                     |                    |                    |                    |                    |       |                    |                    |                    |                    |        |
|-------------------------------------|--------------------|--------------------|--------------------|--------------------|-------|--------------------|--------------------|--------------------|--------------------|--------|
| High adherence, n (%)               | 28 (28.3)          | 4 (21.1)           | 40 (19.1)          | 21 (22.8)          |       | 43 (32.1)          | 9 (30.0)           | 59 (23.5)          | 52 (37.4)          |        |
| Total energy intake, mean $\pm$ sd  | 2574.5 $\pm$ 602.3 | 2439.1 $\pm$ 534.9 | 2444.4 $\pm$ 527.7 | 2257.4 $\pm$ 548.4 | 0.001 | 2264.2 $\pm$ 527.9 | 2338.7 $\pm$ 575.1 | 2127.1 $\pm$ 461.6 | 2085.3 $\pm$ 484.5 | 0.003  |
| %Total fat intake,mean $\pm$ sd     | 37.7 $\pm$ 6.1     | 38.3 $\pm$ 8.3     | 39.5 $\pm$ 6.4     | 38.9 $\pm$ 7.0     | 0.154 | 38.0 $\pm$ 6.7     | 38.9 $\pm$ 7.7     | 40.5 $\pm$ 6.0     | 37.7 $\pm$ 7.3     | 0.001  |
| % Monounsaturate fat, mean $\pm$ sd | 19.3 $\pm$ 3.5     | 19.4 $\pm$ 4.9     | 20.5 $\pm$ 4.6     | 20.1 $\pm$ 5.2     | 0.182 | 19.7 $\pm$ 4.4     | 20.2 $\pm$ 5.8     | 21.1 $\pm$ 4.2     | 19.5 $\pm$ 5.1     | 0.002  |
| % Polyunsaturate fat, mean $\pm$ sd | 6.3 $\pm$ 2.3      | 6.4 $\pm$ 2.5      | 6.4 $\pm$ 1.8      | 6.7 $\pm$ 2.0      | 0.671 | 6.2 $\pm$ 1.9      | 6.7 $\pm$ 2.2      | 6.3 $\pm$ 1.7      | 6.4 $\pm$ 1.9      | 0.429  |
| % Saturated fat,mean $\pm$ sd       | 9.4 $\pm$ 1.8      | 10.0 $\pm$ 2.5     | 10.1 $\pm$ 2.0     | 9.5 $\pm$ 1.7      | 0.008 | 9.3 $\pm$ 1.9      | 9.6 $\pm$ 2.3      | 10.2 $\pm$ 2.0     | 9.1 $\pm$ 1.9      | <0.001 |
| % Carbohydrate intake,mean $\pm$ sd | 41.6 $\pm$ 6.8     | 40.5 $\pm$ 8.2     | 39.9 $\pm$ 6.4     | 41.4 $\pm$ 7.1     | 0.148 | 43.6 $\pm$ 7.0     | 43.0 $\pm$ 8.2     | 40.5 $\pm$ 6.4     | 44.3 $\pm$ 7.1     | <0.001 |
| Protein intake (%),mean $\pm$ sd    | 15.5 $\pm$ 2.0     | 17.2 $\pm$ 3.2     | 16.1 $\pm$ 2.4     | 15.7 $\pm$ 2.6     | 0.015 | 17.3 $\pm$ 2.3     | 16.9 $\pm$ 2.6     | 17.6 $\pm$ 2.9     | 17.1 $\pm$ 2.6     | 0.255  |
| Alcohol intake (g/d),mean $\pm$ sd  | 20.2 $\pm$ 18.7    | 12.2 $\pm$ 12.7    | 15.9 $\pm$ 15.9    | 12.9 $\pm$ 12.6    | 0.010 | 3.5 $\pm$ 6.7      | 3.6 $\pm$ 3.8      | 4.5 $\pm$ 7.6      | 2.7 $\pm$ 5.0      | 0.064  |
| Fiber intake (g/d),mean $\pm$ sd    | 26.9 $\pm$ 8.1     | 27.5 $\pm$ 9.8     | 26.7 $\pm$ 9.2     | 25.3 $\pm$ 8.5     | 0.511 | 28.2 $\pm$ 9.0     | 29.3 $\pm$ 11.5    | 25.5 $\pm$ 8.0     | 27.1 $\pm$ 8.5     | 0.010  |

Values are means  $\pm$  SD for continuous variables and percentages (n) for categorical variables unless otherwise indicated. Abbreviations: (MedDietQ-P17<sup>b</sup>), Mediterranean diet questionnaire 17 point cut off

**Table S3.** Participants with nutrient intake below AR/AI proposed by EFSA by geographical areas, age and sex.

| <i>Nutrient</i>              | <i>Group</i>               | <i>AR/AI<sup>a</sup></i> | <i>North area</i> | <i>Central area</i> | <i>East area</i> | <i>South area</i> | <i>P value<sup>1</sup></i> |
|------------------------------|----------------------------|--------------------------|-------------------|---------------------|------------------|-------------------|----------------------------|
| <b>Dietary fiber</b>         | Male                       | 25g /d                   | 55.3              | 53.3                | 54.2             | 58.9              | 0.183                      |
|                              | Female                     | 25g /d                   | 49.8              | 48.5                | 48.7             | 45.2              | 0.273                      |
|                              | <b>P value<sup>2</sup></b> |                          | 0.037             | 0.313               | 0.003            | <0.001            |                            |
| <b>Vitamin A</b>             | Male                       | 570 µg/d                 | 23.5              | 19.2                | 14.2             | 14.5              | <0.001                     |
|                              | Female                     | 490 µg/d                 | 9.8               | 7.4                 | 7.8              | 6.6               | 0.154                      |
|                              | <b>P value<sup>2</sup></b> |                          | <0.001            | <0.001              | <0.001           | <0.001            |                            |
| <b>Vitamin B<sub>9</sub></b> | Male                       | 250 µg/d                 | 13.6              | 15.4                | 16.5             | 17.1              | 0.201                      |
|                              | Female                     | 250 µg/d                 | 11.3              | 13.4                | 14.5             | 14.8              | 0.196                      |
|                              | <b>P value<sup>2</sup></b> |                          | 0.189             | 0.542               | 0.123            | 0.202             |                            |
| <b>Vitamin D</b>             | Male                       | 15 µg/d                  | 99.3              | 95.0                | 99.1             | 99.1              | <0.001                     |
|                              | Female                     | 15 µg/d                  | 99.5              | 96.5                | 99.0             | 99.1              | 0.004                      |
|                              | <b>P value<sup>2</sup></b> |                          | 0.562             | 0.428               | 0.680            | 0.914             |                            |
| <b>Vitamin E</b>             | Male                       | 13 mg/d                  | 86.4              | 77.5                | 75.5             | 75.7              | <0.001                     |
|                              | Female                     | 11 mg/d                  | 76.0              | 60.4                | 65.0             | 63.2              | <0.001                     |
|                              | <b>P value<sup>2</sup></b> |                          | <0.001            | <0.001              | <0.001           | <0.001            |                            |
| <b>Calcium</b>               | Male                       | 950 mg/d                 | 48.6              | 37.5                | 46.5             | 45.8              | 0.026                      |
|                              | Female                     | 950 mg/d                 | 43.4              | 37.1                | 46.7             | 43.5              | 0.045                      |
|                              | <b>P value<sup>2</sup></b> |                          | 0.051             | 0.936               | 0.871            | 0.336             |                            |
| <b>Magnesium</b>             | Male                       | 350 mg/d                 | 34.9              | 29.2                | 31.3             | 32.4              | 0.233                      |
|                              | Female                     | 350 mg/d                 | 18.8              | 12.9                | 16.2             | 16.3              | 0.232                      |
|                              | <b>P value<sup>2</sup></b> |                          | <0.001            | <0.001              | <0.001           | <0.001            |                            |

<sup>a</sup>AR/AI: Average Requirements/Adequate intake according to EFSA criteria. Pearson's Chi Square test was used to estimate differences among prevalence of inadequate nutrient intakes according to geographical area for sex strata (*p value<sup>1</sup>*) and also to estimate differences among prevalence of inadequate nutrient intakes according to sex, for each geographical area (*p value<sup>2</sup>*).

**Table S4.** Logistic regression model of micronutrients inadequate intake according to EFSA by geographical areas.

| <i>Nutrient</i>      |         | <i>North area</i> | <i>Central area</i> | <i>East area</i> | <i>South area</i> |
|----------------------|---------|-------------------|---------------------|------------------|-------------------|
| <b>Dietary fiber</b> | Model 1 | 1 (Ref.)          | 0.93 (0.75-1.15)    | 0.94 (0.83-1.08) | 0.95 (0.83-1.10)  |
|                      | Model 2 | 1 (Ref.)          | 0.92 (0.71-1.19)    | 0.72 (0.62-0.84) | 0.78 (0.66-0.91)  |
| <b>Vitamin A</b>     | Model 1 | 1 (Ref.)          | 0.75 (0.55-1.01)    | 0.58 (0.48-0.69) | 0.54 (0.44-0.67)  |
|                      | Model 2 | 1 (Ref.)          | 0.68 (0.49-0.96)    | 0.49 (0.40-0.59) | 0.45 (0.36-0.56)  |
| <b>Vitamin B9</b>    | Model 1 | 1 (Ref.)          | 1.18 (0.86-1.60)    | 1.27 (1.06-1.53) | 1.32 (1.08-1.61)  |
|                      | Model 2 | 1 (Ref.)          | 1.05 (0.73-1.51)    | 1.02 (0.83-1.26) | 1.06 (0.84-1.34)  |
| <b>Vitamin E</b>     | Model 1 | 1 (Ref.)          | 0.51 (0.40-0.65)    | 0.52 (0.44-0.61) | 0.50 (0.42-0.59)  |
|                      | Model 2 | 1 (Ref.)          | 0.45 (0.34-0.61)    | 0.36 (0.30-0.43) | 0.33 (0.27-0.40)  |
| <b>Calcium</b>       | Model 1 | 1 (Ref.)          | 0.69 (0.55-0.86)    | 1.01 (0.89-1.15) | 0.93 (0.81-1.07)  |
|                      | Model 2 | 1 (Ref.)          | 0.56 (0.43-0.73)    | 0.87 (0.75-1.00) | 0.70 (0.59-0.82)  |
| <b>Magnesium</b>     | Model 1 | 1 (Ref.)          | 0.71 (0.55-0.92)    | 0.80 (0.70-0.93) | 0.82 (0.70-0.96)  |
|                      | Model 2 | 1 (Ref.)          | 0.55 (0.38-0.80)    | 0.47 (0.39-0.58) | 0.45 (0.36-0.56)  |

Values are presented as OR and 95% CI for the inadequacy intake of micronutrients as categorical variable according to area of residence. Model 1: This model has not been adjusted for any variable. Model 2: has been adjusted by sex, age, smoking habits, physical activity, educational status, diabetic status, living alone, total energy intake and adherence to MedDiet.

**Table S5.** Logistic regression model of micronutrients deficiency intake according to 2/3 DRIs by areas.

|                           | <i>DIETARY FIBER</i>  |                          | <i>VITAMIN A</i>      |                          | <i>VITAMIN B<sub>9</sub></i> |                          | <i>VITAMIN E</i>      |                          | <i>CALCIUM</i>        |                          | <i>MAGNESIUM</i>      |                          |
|---------------------------|-----------------------|--------------------------|-----------------------|--------------------------|------------------------------|--------------------------|-----------------------|--------------------------|-----------------------|--------------------------|-----------------------|--------------------------|
|                           | <b>OR</b><br>(CI 95%) | <i>p</i><br><i>value</i> | <b>OR</b><br>(CI 95%) | <i>p</i><br><i>value</i> | <b>OR</b><br>(CI 95%)        | <i>p</i><br><i>value</i> | <b>OR</b><br>(CI 95%) | <i>p</i><br><i>value</i> | <b>OR</b><br>(CO 95%) | <i>p</i><br><i>value</i> | <b>OR</b><br>(CI 95%) | <i>p</i><br><i>value</i> |
| <b>Geographical areas</b> |                       |                          |                       |                          |                              |                          |                       |                          |                       |                          |                       |                          |
| North area                | 1 (Ref.)              |                          | 1 (Ref.)              |                          | 1 (Ref.)                     |                          | 1 (Ref.)              |                          | 1 (Ref.)              |                          | 1 (Ref.)              |                          |
| Central area              | 1.03<br>(0.72-1.46)   | 0.874                    | 0.57<br>(0.41-0.80)   | 0.001                    | 0.98<br>(0.70-1.36)          | 0.889                    | 0.47<br>(0.36-0.61)   | <0.001                   | 0.53<br>(0.38-0.76)   | <0.001                   | 0.39<br>(0.21-0.75)   | 0.005                    |
| East area                 | 0.80<br>(0.65-0.98)   | 0.033                    | 0.43<br>(0.35-0.52)   | <0.001                   | 0.97<br>(0.80-1.17)          | 0.721                    | 0.30<br>(0.26-0.35)   | <0.001                   | 0.86<br>(0.72-1.04)   | 0.112                    | 0.35<br>(0.25-0.50)   | <0.001                   |
| South area                | 0.92                  | 0.454                    | 0.40                  | <0.001                   | 1.09                         | 0.437                    | 0.30                  | <0.001                   | 0.80                  | 0.029                    | 0.33                  | <0.001                   |

|                                 |                     |        |                     |        |                     |        |                     |        |                     |        |                     |        |
|---------------------------------|---------------------|--------|---------------------|--------|---------------------|--------|---------------------|--------|---------------------|--------|---------------------|--------|
|                                 | (0.73-1.15)         |        | (0.32-0.50)         |        | (0.88-1.34)         |        | (0.25-0.36)         |        | (0.65-0.98)         |        | (0.22-0.49)         |        |
| <b>Age</b>                      | 0.83<br>(0.67-1.06) | 0.133  | 1.04<br>(0.84-1.30) | 0.706  | 0.93<br>(0.77-1.14) | 0.507  | 1.25<br>(1.06-1.48) | 0.010  | 1.41<br>(1.17-1.70) | <0.001 | 0.92<br>(0.62-1.38) | 0.713  |
| <b>Sex</b>                      |                     |        |                     |        |                     |        |                     |        |                     |        |                     |        |
| Men                             | 1 (Ref.)            |        | 1 (Ref.)            |        | 1 (Ref.)            |        | 1 (Ref.)            |        | 1 (Ref.)            |        | 1 (Ref.)            |        |
| Female                          | 0.05<br>(0.04-0.07) | <0.001 | 0.19<br>(0.16-0.23) | <0.001 | 0.49<br>(0.42-0.58) | <0.001 | 0.66<br>(0.58-0.76) | <0.001 | 1.36<br>(1.15-1.60) | <0.001 | 0.93<br>(0.62-1.38) | 0.713  |
| <b>MedDiet adherence</b>        |                     |        |                     |        |                     |        |                     |        |                     |        |                     |        |
| Low adherence                   | 1 (Ref.)            |        | 1 (Ref.)            |        | 1 (Ref.)            |        | 1 (Ref.)            |        | 1 (Ref.)            |        | 1 (Ref.)            |        |
| Moderate adherence              | 0.41<br>(0.35-0.49) | <0.001 | 0.71<br>(0.60-0.84) | <0.001 | 0.47<br>(0.40-0.54) | <0.001 | 0.58<br>(0.51-0.67) | <0.001 | 0.78<br>(0.66-0.91) | 0.002  | 0.25<br>(0.18-0.35) | <0.001 |
| High adherence                  | 0.14<br>(0.11-0.18) | <0.001 | 0.44<br>(0.35-0.55) | <0.001 | 0.19<br>(0.16-0.24) | <0.001 | 0.35<br>(0.30-0.41) | <0.001 | 0.58<br>(0.48-0.71) | <0.001 | 0.09<br>(0.06-0.15) | <0.001 |
| <b>Energy intake (kcal/day)</b> | 0.99<br>(0.99-0.99) | <0.001 | 0.99<br>(0.99-0.99) | <0.001 | 0.99<br>(0.99-0.99) | <0.001 | 0.99<br>(0.99-0.99) | <0.001 | 0.99<br>(0.99-0.99) | <0.001 | 0.99<br>(0.99-0.99) | <0.001 |
| <b>Smoking habits</b>           |                     |        |                     |        |                     |        |                     |        |                     |        |                     |        |
| Current smoker                  | 1 (Ref.)            |        | 1 (Ref.)            |        | 1 (Ref.)            |        | 1 (Ref.)            |        | 1 (Ref.)            |        | 1 (Ref.)            |        |
| Former smoker                   | 0.71<br>(0.57-0.88) | 0.002  | 1.09<br>(0.86-1.38) | 0.472  | 0.69<br>(0.56-0.86) | 0.001  | 0.84<br>(0.69-1.01) | 0.119  | 0.84<br>(0.67-1.06) | 0.125  | 0.60<br>(0.41-0.87) | 0.007  |
| Never smoker                    | 0.67<br>(0.52-0.85) | 0.001  | 0.97<br>(0.75-1.25) | 0.798  | 0.60<br>(0.48-0.75) | <0.001 | 0.82<br>(0.67-1.00) | 0.047  | 0.68<br>(0.54-0.86) | 0.001  | 0.51<br>(0.33-0.79) | 0.003  |
| <b>Physical activity</b>        |                     |        |                     |        |                     |        |                     |        |                     |        |                     |        |
| Less active                     | 1 (Ref.)            |        | 1 (Ref.)            |        | 1 (Ref.)            |        | 1 (Ref.)            |        | 1 (Ref.)            |        | 1 (Ref.)            |        |
| Moderate active                 | 0.58<br>(0.47-0.72) | <0.001 | 0.82<br>(0.67-1.01) | 0.064  | 0.65<br>(0.53-0.79) | <0.001 | 0.96<br>(0.82-1.12) | 0.578  | 0.83<br>(0.69-1.00) | 0.056  | 0.52<br>(0.35-0.77) | 0.001  |
| Active                          | 0.83<br>(0.67-1.01) | 0.065  | 0.88<br>(0.72-1.07) | 0.187  | 0.88<br>(0.74-1.06) | 0.187  | 0.93<br>(0.79-1.08) | 0.323  | 1.00<br>(0.84-1.20) | 0.982  | 0.83<br>(0.58-1.19) | 0.306  |
| <b>Education level</b>          |                     |        |                     |        |                     |        |                     |        |                     |        |                     |        |
| Tertiary level                  | 1 (Ref.)            |        | 1 (Ref.)            |        | 1 (Ref.)            |        | 1 (Ref.)            |        | 1 (Ref.)            |        | 1 (Ref.)            |        |
| Secondary level                 | 0.91<br>(0.74-1.12) | 0.376  | 0.81<br>(0.66-1.01) | 0.048  | 1.02<br>(0.84-1.24) | 0.829  | 1.20<br>(1.01-1.42) | 0.035  | 1.02<br>(0.83-1.25) | 0.869  | 1.00<br>(0.68-1.46) | 0.984  |
| Primary level                   | 0.75<br>(0.62-0.92) | 0.006  | 0.88<br>(0.73-1.08) | 0.221  | 0.80<br>(0.67-0.97) | 0.022  | 1.12<br>(0.95-1.31) | 0.177  | 1.04<br>(0.85-1.25) | 0.725  | 1.22<br>(0.85-1.76) | 0.277  |
| <b>Non diabetic</b>             | 0.79<br>(0.66-0.94) | 0.008  | 0.81<br>(0.68-0.97) | 0.019  | 0.95<br>(0.80-1.10) | 0.481  | 0.85<br>(0.75-0.97) | 0.019  | 0.79<br>(0.68-0.93) | 0.004  | 0.81<br>(0.59-1.10) | 0.176  |
| <b>Living alone</b>             | 0.84<br>(0.64-1.10) | 0.193  | 0.91<br>(0.71-1.17) | 0.466  | 0.82<br>(0.67-1.01) | 0.068  | 0.93<br>(0.77-1.11) | 0.426  | 1.09<br>(0.89-1.35) | 0.376  | 1.31<br>(0.80-2.13) | 0.285  |

OR, p value and 95% CI for the inadequacy intake of micronutrients as categorical variable according to area. Model has been adjusted by sex, age, smoking habits, physical activity, educational status, diabetic status, living alone, total energy intake and adherence into MedDiet Q-P17.

**Table S6.** Logistic regression model of micronutrients deficiency intake according to EFSA by areas.

|                                 | <i>DIETARY FIBER</i> |            | <i>VITAMIN A</i>    |            | <i>VITAMIN B<sub>9</sub></i> |            | <i>VITAMIN E</i>    |            | <i>CALCIUM</i>      |            | <i>MAGNESIUM</i>    |            |
|---------------------------------|----------------------|------------|---------------------|------------|------------------------------|------------|---------------------|------------|---------------------|------------|---------------------|------------|
|                                 | OR<br>(CI 95%)       | p<br>value | OR<br>(CI 95%)      | p<br>value | OR<br>(CI 95%)               | p<br>value | OR<br>(CI 95%)      | p<br>value | OR<br>(CO 95%)      | p<br>value | OR<br>(CI 95%)      | p<br>value |
| <b>Geographical areas</b>       |                      |            |                     |            |                              |            |                     |            |                     |            |                     |            |
| North area                      | 1 (Ref.)             |            | 1 (Ref.)            |            | 1 (Ref.)                     |            | 1 (Ref.)            |            | 1 (Ref.)            |            | 1 (Ref.)            |            |
| Central area                    | 0.92<br>(0.71-1.19)  | 0.518      | 0.68<br>(0.49-0.96) | 0.026      | 1.05<br>(0.73-1.50)          | 0.798      | 0.48<br>(0.34-0.61) | <0.001     | 0.56<br>(0.44-0.73) | <0.001     | 0.51<br>(0.36-0.74) | >0.001     |
| East area                       | 0.72<br>(0.62-0.84)  | <0.001     | 0.49<br>(0.40-0.59) | <0.001     | 1.02<br>(0.83-1.26)          | 0.859      | 0.36<br>(0.30-0.43) | <0.001     | 0.87<br>(0.75-1.00) | 0.051      | 0.48<br>(0.39-0.59) | <0.001     |
| South area                      | 0.78<br>(0.66-0.92)  | 0.003      | 0.45<br>(0.36-0.56) | <0.001     | 1.06<br>(0.84-1.34)          | 0.615      | 0.33<br>(0.27-0.40) | <0.001     | 0.70<br>(0.59-0.82) | <0.001     | 0.43<br>(0.35-0.54) | <0.001     |
| <b>Age</b>                      | 0.79<br>(0.67-0.93)  | 0.005      | 0.11<br>(0.76-1.20) | 0.703      | 0.92<br>(0.73-1.14)          | 0.432      | 1.16<br>(0.96-1.39) | 0.125      | 0.95<br>(0.81-1.12) | 0.544      | 0.96<br>(0.77-1.20) | 0.715      |
| <b>Sex</b>                      |                      |            |                     |            |                              |            |                     |            |                     |            |                     |            |
| Men                             | 1 (Ref.)             |            | 1 (Ref.)            |            | 1 (Ref.)                     |            | 1 (Ref.)            |            | 1 (Ref.)            |            | 1 (Ref.)            |            |
| Female                          | 0.47<br>(0.41-0.54)  | <0.001     | 0.27<br>(0.23-0.33) | <0.001     | 0.53<br>(0.44-0.63)          | <0.001     | 0.21<br>(0.18-0.25) | <0.001     | 0.52<br>(0.46-0.60) | <0.001     | 0.08<br>(0.07-0.10) | <0.001     |
| <b>MedDiet adherence</b>        |                      |            |                     |            |                              |            |                     |            |                     |            |                     |            |
| Low adherence                   | (Ref.)               |            | (Ref.)              |            | 1 (Ref.)                     |            | 1 (Ref.)            |            | 1 (Ref.)            |            | 1 (Ref.)            |            |
| Moderate adherence              | 0.37<br>(0.33-0.43)  | <0.001     | 0.68<br>(0.57-0.81) | <0.001     | 0.46<br>(0.39-0.55)          | <0.001     | 0.66<br>(0.56-0.76) | <0.001     | 0.90<br>(0.79-1.02) | 0.108      | 0.35<br>(0.29-0.42) | <0.001     |
| High adherence                  | 0.14<br>(0.12-0.17)  | <0.001     | 0.40<br>(0.31-0.50) | <0.001     | 0.18<br>(0.14-0.23)          | <0.001     | 0.43<br>(0.36-0.51) | <0.001     | 0.68<br>(0.59-0.80) | <0.001     | 0.10<br>(0.08-0.13) | <0.001     |
| <b>Energy intake (kcal/day)</b> | 0.99<br>(0.99-0.99)  | <0.001     | 0.99<br>(0.99-0.99) | <0.001     | 0.99<br>(0.99-0.99)          | <0.001     | 0.99<br>(0.99-0.99) | <0.001     | 0.99<br>(0.99-0.99) | <0.001     | 0.99<br>(0.99-0.99) | <0.001     |
| <b>Smoking habits</b>           |                      |            |                     |            |                              |            |                     |            |                     |            |                     |            |
| Current smoker                  | 1 (Ref.)             |            | 1 (Ref.)            |            | 1 (Ref.)                     |            | 1 (Ref.)            |            | 1 (Ref.)            |            | 1 (Ref.)            |            |
| Former smoker                   | 0.70<br>(0.58-0.85)  | <0.001     | 1.16<br>(0.91-1.48) | 0.241      | 0.67<br>(0.53-0.85)          | 0.001      | 0.87<br>(0.70-1.08) | 0.204      | 0.81<br>(0.67-0.97) | 0.020      | 0.67<br>(0.53-0.85) | 0.001      |
| Never smoker                    | 0.66                 | 0.002      | 1.06                | 0.670      | 0.57                         | <0.001     | 0.89                | 0.324      | 0.69                | <0.001     | 0.60                | <0.001     |

|                          | (0.54-0.80)         |        | (0.81-1.40)         |       | (0.45-0.73)         |        | (0.71-1.12)         |       | (0.57-0.84)         |        | (0.47-0.78)         |       |
|--------------------------|---------------------|--------|---------------------|-------|---------------------|--------|---------------------|-------|---------------------|--------|---------------------|-------|
| <b>Physical activity</b> |                     |        |                     |       |                     |        |                     |       |                     |        |                     |       |
| Less active              | 1 (Ref.)            |        | 1 (Ref.)            |       | 1 (Ref.)            |        | 1 (Ref.)            |       | 1 (Ref.)            |        | 1 (Ref.)            |       |
| Moderate active          | 0.74<br>(0.64-0.86) | <0.001 | 0.80<br>(0.65-1.00) | 0.045 | 0.68<br>(0.55-0.80) | <0.001 | 0.83<br>(0.70-0.98) | 0.029 | 0.81<br>(0.70-0.93) | 0.004  | 0.73<br>(0.59-0.89) | 0.002 |
| Active                   | 0.80<br>(0.69-0.92) | 0.003  | 0.95<br>(0.78-1.16) | 0.636 | 0.86<br>(0.71-1.06) | 0.157  | 0.93<br>(0.79-1.10) | 0.425 | 0.85<br>(0.74-0.98) | 0.029  | 0.86<br>(0.70-1.05) | 0.132 |
| <b>Education level</b>   |                     |        |                     |       |                     |        |                     |       |                     |        |                     |       |
| Tertiary level           | 1 (Ref.)            |        | 1 (Ref.)            |       | 1 (Ref.)            |        | 1 (Ref.)            |       | 1 (Ref.)            |        | 1 (Ref.)            |       |
| Secondary level          | 0.94<br>(0.80-1.11) | 0.491  | 0.93<br>(0.75-1.15) | 0.488 | 1.06<br>(0.85-1.31) | 0.599  | 1.20<br>(1.00-1.45) | 0.047 | 0.99<br>(0.85-1.16) | 0.930  | 1.02<br>(0.82-1.27) | 0.846 |
| Primary level            | 0.86<br>(0.74-1.00) | 0.054  | 0.97<br>(0.79-1.20) | 0.804 | 0.79<br>(0.64-0.97) | 0.026  | 1.11<br>(0.94-1.32) | 0.218 | 1.04<br>(0.90-1.21) | 0.598  | 1.15<br>(0.94-1.41) | 0.181 |
| <b>Non diabetic</b>      | 0.91<br>(0.80-1.03) | 0.141  | 0.78<br>(0.65-0.94) | 0.008 | 0.94<br>(0.79-1.11) | 0.468  | 0.79<br>(0.69-0.92) | 0.002 | 0.74<br>(0.65-0.84) | <0.001 | 0.87<br>(0.73-1.03) | 0.110 |
| <b>Living alone</b>      | 1.16<br>(0.97-1.38) | 0.101  | 0.89<br>(0.70-1.14) | 0.353 | 0.78<br>(0.62-0.98) | 0.032  | 0.88<br>(0.72-1.07) | 0.191 | 0.96<br>(0.81-1.14) | 0.664  | 1.15<br>(0.90-1.47) | 0.252 |

OR, p value and 95% CI for the inadequacy intake of micronutrients as categorical variable according to area. Model has been adjusted by sex, age, smoking habits, physical activity, educational status, diabetic status, living alone, total energy intake and adherence into MedDiet Q-P17.



**Table S7.** Multivariable logistic regression model for inadequate intake of 3 or more out of 6 micronutrients in accordance with criteria by EFSA according to geographical area.

|                          | <b>≥3 inadequate intake<br/>% Prevalence (95% CI)</b> | <b>Odds Ratio<br/>(95% CI)</b> | <b>P value</b> |
|--------------------------|-------------------------------------------------------|--------------------------------|----------------|
| <b>Geographical area</b> |                                                       |                                |                |
| <b>North area</b>        | 40.8 (38.2-43.3)                                      | 1 (Ref.)                       |                |
| <b>Central area</b>      | 33.5 (29.1-37.9)                                      | 0.59 (0.44-0.80)               | 0.001          |
| <b>East area</b>         | 36.6 (34.8-38.3)                                      | 0.59 (0.50-0.69)               | <0.001         |
| <b>South area</b>        | 37.4 (35.1-39.7)                                      | 0.59 (0.49-0.71)               | <0.001         |

Results are expressed as OR and 95% CI for the inadequacy intake of  $\geq 3$  micronutrients as categorical variable according to geographical area. The model has been adjusted by sex, age, smoking habits, physical activity, educational status, diabetic status, living alone, total energy intake and adherence to MedDiet.
